# Supplementary material for: Heuristic modeling of macromolecule release from PLGA microspheres
Source: PubMed Central journal article supplement — Int J Nanomedicine. 2013 Dec 3;8:4601–11. doi: 10.2147/IJN.S53364 (PMC3857266; doi:10.2147/ijn.s53364), 2013-12-03
Supplement: ijn-8-4601-supplement.pdf [file ijn-8-4601-supplement.pdf]

## Supplementary material

**Table S1** List of publications used in data extraction

1. Kang F, Singh J. Effect of additives on the release of a model protein from PLGA microspheres. *AAPS PharmSciTech*. 2001;2(4):30.
2. Zhou XL, He JT, Du HJ, et al. Pharmacokinetic and pharmacodynamic profiles of recombinant human erythropoietin-loaded poly(lactic-co-glycolic acid) microspheres in rats. *Acta Pharmacol Sin*. 2012;33(1):137–44.
3. Fan D, De Rosa E, Murphy MB, et al. Mesoporous silicon-PLGA composite microspheres for the double controlled release of biomolecules for orthopedic tissue engineering. *Adv Funct Mater*. 2012;22(2):282–293.
4. Kim TH, Lee H, Park TG. Pegylated recombinant human epidermal growth factor (rhEGF) for sustained release from biodegradable PLGA microspheres. *Biomaterials*. 2002;23(11):2311–2317.
5. Blanco D, Alonso MJ. Protein encapsulation and release from poly(lactide-co-glycolide) microspheres: effect of the protein and polymer properties and of the co-encapsulation of surfactants. *Eur J Pharm Biopharm*. 1998;45(3):285–294.
6. Mok H, Park TG. Water-free microencapsulation of proteins within PLGA microparticles by spray drying using PEG-assisted protein solubilization technique in organic solvent. *Eur J Pharm Biopharm*. 2008;70(1):137–144.
7. Buske J, König C, Bassarab S, Lamprecht A, Mühlau S, Wagner KG. Influence of PEG in PEG-PLGA microspheres on particle properties and protein release. *Eur J Pharm Biopharm*. 2012;81(1):57–63.
8. Corrigan OI, Li X. Quantifying drug release from PLGA nanoparticulates. *Eur J Pharm Sci*. 2009;37(3–4):477–485.
9. Puras G, Salvador A, Igartua M, Hernández RM, Pedraz JL. Encapsulation of A $\beta$ (1–15) in PLGA microparticles enhances serum antibody response in mice immunized by subcutaneous and intranasal routes. *Eur J Pharm Sci*. 2011;44(3):200–206.
10. Kim HK, Park TG. Microencapsulation of dissociable human growth hormone aggregates within poly(D,L-lactic-co-glycolic acid) microparticles for sustained release. *Int J Pharm*. 2001;229(1–2):107–116.
11. Han Y, Tian H, He P, Chen X, Jing X. Insulin nanoparticle preparation and encapsulation into poly(lactic-co-glycolic acid) microspheres by using an anhydrous system. *Int J Pharm*. 2009;378(1–2):159–166.
12. He J, Feng M, Zhou X, et al. Stabilization and encapsulation of recombinant human erythropoietin into PLGA microspheres using human serum albumin as a stabilizer. *Int J Pharm*. 2011;416(1):69–76.
13. Gasper MM, Blanco D, Cruz ME, Alonso MJ. Formulation of L-asparaginase-loaded poly(lactide-co-glycolide) nanoparticles: influence of polymer properties on enzyme loading, activity and in vitro release. *J Control Release*. 1998;52(1–2):53–62.
14. Kawashima Y, Yamamoto H, Takeuchi H, Fujioka S, Hino T. Pulmonary delivery of insulin with nebulized DL-lactide/glycolide copolymer (PLGA) nanospheres to prolong hypoglycemic effect. *J Control Release*. 1999;62(1–2):279–287.
15. Ungaro F, d'Emmanuele di Villa Bianca R, Giovino C, et al. Insulin-loaded PLGA/cyclodextrin large porous particles with improved aerosolization properties: in vivo deposition and hypoglycaemic activity after delivery to rat lungs. *J Control Release*. 2009;135(1):25–34.
16. Jiang HL, Jin JF, Hu YQ, Zhu KJ. Improvement of protein loading and modulation of protein release from poly(lactide-co-glycolide) microspheres by complexation of proteins with polyanions. *J Microencapsul*. 2004;21(6):615–624.
17. Pirooznia N, Hasannia S, Lotfi AS, Ghanei M. Encapsulation of alpha-1 antitrypsin in PLGA nanoparticles: in vitro characterization as an effective aerosol formulation in pulmonary diseases. *J Nanobiotechnology*. 2012;10:20.
18. Castellanos IJ, Flores G, Griebenow K. Effect of cyclodextrins on alpha-chymotrypsin stability and loading in PLGA microspheres upon S/O/W encapsulation. *J Pharm Sci*. 2006;95(4):849–858.

**Table S2** Full data base used in the study

The full data base of macromolecules release from PLGA microparticles

[http://nigella.farmacja.cm-uj.krakow.pl/~kuba/Int\\_J\\_Nanomedicine/Supplementary\\_material\\_S2.xlsx](http://nigella.farmacja.cm-uj.krakow.pl/~kuba/Int_J_Nanomedicine/Supplementary_material_S2.xlsx)

**Table S3** The results of the formulation-to-formulation reIRMSE (%)

| Formulation no | reIRMSE (%)   |                       |
|----------------|---------------|-----------------------|
|                | MON-MLP model | GP model (Equation 2) |
| 1              | 9.56          | 14.43                 |
| 2              | 10.29         | 11.70                 |
| 3              | 22.14         | 18.00                 |
| 4              | 2.56          | 11.74                 |
| 5              | 22.63         | 14.75                 |
| 6              | 12.01         | 19.47                 |
| 7              | 10.72         | 13.99                 |
| 8              | 10.12         | 13.87                 |
| 9              | 11.42         | 12.84                 |
| 10             | 20.92         | 21.92                 |
| 11             | 17.73         | 5.25                  |
| 12             | 7.48          | 8.78                  |
| 13             | 17.47         | 8.94                  |
| 14             | 12.79         | 23.37                 |
| 15             | 3.12          | 5.35                  |
| 16             | 1.75          | 9.75                  |
| 17             | 16.10         | 6.76                  |
| 18             | 13.47         | 8.76                  |
| 19             | 1.83          | 5.27                  |
| 20             | 4.31          | 8.38                  |
| 21             | 12.97         | 15.05                 |
| 22             | 3.87          | 7.57                  |
| 23             | 6.26          | 12.34                 |
| 24             | 6.55          | 6.99                  |
| 25             | 5.35          | 12.21                 |
| 26             | 25.05         | 13.12                 |
| 27             | 14.48         | 8.83                  |
| 28             | 17.05         | 14.67                 |
| 29             | 11.20         | 9.26                  |
| 30             | 15.05         | 7.01                  |
| 31             | 36.03         | 27.25                 |
| 32             | 34.23         | 26.38                 |
| 33             | 8.21          | 10.49                 |
| 34             | 26.99         | 25.33                 |

(Continued)

**Table S3 (Continued)**

| Formulation no | reIRMSE (%)   |                       |
|----------------|---------------|-----------------------|
|                | MON-MLP model | GP model (Equation 2) |
| 35             | 6.85          | 5.46                  |
| 36             | 26.82         | 22.38                 |
| 37             | 28.55         | 22.87                 |
| 38             | 19.27         | 24.45                 |
| 39             | 8.78          | 11.05                 |
| 40             | 9.20          | 9.04                  |
| 41             | 18.09         | 17.55                 |
| 42             | 16.36         | 15.15                 |
| 43             | 10.71         | 5.39                  |
| 44             | 7.15          | 10.71                 |
| 45             | 20.51         | 7.39                  |
| 46             | 8.75          | 32.83                 |
| 47             | 15.23         | 23.02                 |
| 48             | 21.05         | 20.61                 |
| 49             | 4.70          | 17.83                 |
| 50             | 11.18         | 6.56                  |
| 51             | 10.90         | 16.59                 |
| 52             | 11.20         | 18.85                 |
| 53             | 10.85         | 19.87                 |
| 54             | 7.63          | 10.20                 |
| 55             | 25.31         | 10.20                 |
| 57             | 19.16         | 24.17                 |
| 58             | 24.05         | 21.14                 |
| 59             | 31.39         | 29.31                 |
| 60             | 28.53         | 22.90                 |
| 61             | 30.81         | 5.76                  |
| 62             | 18.73         | 6.79                  |
| 63             | 7.59          | 8.59                  |
| 64             | 13.37         | 6.16                  |
| 65             | 8.93          | 7.73                  |
| 66             | 4.61          | 10.34                 |
| 67             | 11.72         | 4.76                  |
| 68             | 14.25         | 5.85                  |
| Min            | 1.75          | 4.76                  |
| Max            | 36.03         | 32.83                 |
| Mean           | 14.39         | 13.75                 |

## International Journal of Nanomedicine

Dovepress

## Publish your work in this journal

The International Journal of Nanomedicine is an international, peer-reviewed journal focusing on the application of nanotechnology in diagnostics, therapeutics, and drug delivery systems throughout the biomedical field. This journal is indexed on PubMed Central, MedLine, CAS, SciSearch®, Current Contents®/Clinical Medicine,

Submit your manuscript here: <http://www.dovepress.com/international-journal-of-nanomedicine-journal>

Journal Citation Reports/Science Edition, EMBase, Scopus and the Elsevier Bibliographic databases. The manuscript management system is completely online and includes a very quick and fair peer-review system, which is all easy to use. Visit <http://www.dovepress.com/testimonials.php> to read real quotes from published authors.
